# Supplementary material for: Mutation to ispA Produces Stable Small-Colony Variants of Pseudomonas aeruginosa That Have Enhanced Aminoglycoside Resistance
Source: PubMed Central journal article supplement (PMC9295567; doi:10.1128/aac.00621-22), 2022-07-05
Supplement: aac.00621-22-s0001.pdf [file aac.00621-22-s0001.pdf]

1 SUPPLEMENTAL MATERIAL

2  
3 **Mutation to *ispA* produces stable small colony variants of *Pseudomonas aeruginosa* that have**  
4 **enhanced aminoglycoside resistance**

5  
6 Melissa Pitton<sup>1,2</sup>, Simone Oberhaensli<sup>3</sup>, Fiona Appiah<sup>1</sup>, Jean Luc Pagani<sup>4</sup>, Anne Fournier<sup>4</sup>, Stephan M.  
7 Jakob<sup>1</sup>, Yok-Ai Que<sup>1,\*,#</sup>, and David R. Cameron<sup>1,\*</sup>

8  
9 1. Department of Intensive Care Medicine, Inselspital, Bern University Hospital, University of Bern,  
10 Bern, Switzerland

11 2. Graduate School for Cellular and Biomedical Sciences (GCB), University of Bern, Bern, Switzerland

12 3. Interfaculty Bioinformatics Unit and SIB Swiss Institute of Bioinformatics, University of Bern, Bern,  
13 Switzerland

14 4. Service of Intensive Care Medicine, Lausanne University Hospital and University of Lausanne,  
15 Lausanne, Switzerland

16 \* equal contribution

17  
18 **#Corresponding author**

19 Yok-Ai Que, MD, PhD

20 Department of Intensive Care Medicine, INO E-403

21 Inselspital; Bern University Hospital

22 3010 Bern, Switzerland

23 Tel: +41 31 632 45 21

24 E-Mail: [Yok-Ai.Que@insel.ch](mailto:Yok-Ai.Que@insel.ch)

25  
26 **Keywords:** SCV, antibiotic resistance, tobramycin, gentamycin, burn wound infection.

27  
28

29  
30

**Table S1.** Strains and plasmids used in this study

| Strains/Plasmids                                       | Description                                                                         | Phenotype | Source     |
|--------------------------------------------------------|-------------------------------------------------------------------------------------|-----------|------------|
| <b><i>P. aeruginosa</i></b>                            |                                                                                     |           |            |
| MP02                                                   | Clinical isolate                                                                    | NCV       | This study |
| MP10                                                   | Clinical isolate                                                                    | SCV       | This study |
| MP02 $\Delta$ <i>ispA</i>                              | MP02 mutant with <i>ispA</i> in-frame deletion                                      | SCV       | This study |
| MP02 <i>ispA</i> <sup><math>\Delta</math>267-270</sup> | MP02 mutant with <i>ispA</i> harboring the 12-base pair deletion identified in MP10 | SCV       | This study |
| MP10 <i>ispA</i> ::WT                                  | MP10 mutant complemented in <i>cis</i> with wild-type <i>ispA</i>                   | NCV       | This study |
| <b><i>E. coli</i></b>                                  |                                                                                     |           |            |
| DH5 $\alpha$                                           | Cloning strain                                                                      |           | Lab stock  |
| SM10 $\lambda$ pir                                     | Conjugative strain for biparental mating                                            |           | (1)        |
| <b>Plasmids</b>                                        |                                                                                     |           |            |
| pEX18Gm                                                | Gene replacement vector, oriT+, sacB+, MCS from pUC18, GmR (=gentamicin resistance) |           | (2)        |
| pEX $\Delta$ <i>ispA</i>                               | pEX18 derivative used to delete <i>ispA</i>                                         |           | This study |
| pEX <i>ispA</i> <sup><math>\Delta</math>267-270</sup>  | pEX18 derivative used to produce <i>ispA</i> <sup><math>\Delta</math>267-270</sup>  |           | This study |
| pEX <i>ispA</i> ::WT                                   | pEX18 derivative used to introduce wild-type <i>ispA</i>                            |           | This study |

31  
32  
33  
34  
35

Abbreviations: NCV, normal colony variant; SCV, small colony variant.

36 **Table S2. Antibigrams for MP02 (NCV) and MP10 (SCV)**  
37

| <b>Antibiotics</b>            | <b>MP02</b> | <b>MP10</b> |
|-------------------------------|-------------|-------------|
| piperacillin/tazobactam       | R           | R           |
| ceftazidime                   | R           | R           |
| cefepime                      | R           | R           |
| imipenem                      | R           | R           |
| meropenem                     | R           | R           |
| aztreonam                     | R           | R           |
| amikacin                      | R           | R           |
| gentamicin                    | R           | R           |
| tobramycin                    | I           | R           |
| colistin                      | S           | S           |
| trimethoprim/sulfamethoxazole | R           | R           |
| ciprofloxacin                 | R           | R           |
| levofloxacin                  | R           | R           |

38  
39 NCV, normal colony variant; R, resistant; I, intermediate; S, susceptible; SCV, small colony variant  
40 Susceptibility profiles as determined by the Institute of Microbiology of the University of Lausanne.

41 **Table S3.** Primers used for mutagenesis  
 42

| Name                     | Sequence (5' → 3')                            | Characteristics                                                           |
|--------------------------|-----------------------------------------------|---------------------------------------------------------------------------|
| ispA_up_fwd              | ccct <u>ctaga</u> <b>ccggcgtaacgggaaagg</b>   | Forward primer to delete full-length <i>ispA</i> gene (upstream region)   |
| ispA_up_rev              | <i>agttgctgcgctgatcatgcctcgtgccttc</i>        | Reverse primer to delete full-length <i>ispA</i> gene (upstream region)   |
| ispA_down_fwd            | <b>gacgcaactgaccgacgg</b>                     | Forward primer to delete full-length <i>ispA</i> gene (downstream region) |
| ispA_down_rev            | ccc <u>gaattcgctcgg</u> tgaggatcttgtgc        | Reverse primer to delete full-length <i>ispA</i> gene (downstream region) |
| ispA_267-<br>270_del_fwd | ccct <u>ctaga</u> <b>ggaacatgccgtctgtctgg</b> | Forward primer to delete amino acids from 267 to 270                      |
| ispA_267-<br>270_del_rev | ccc <u>gaattcggatctt</u> gtgcggataggcc        | Reverse primer to delete amino acids from 267 to 270                      |
| ispA_ins_fwd             | <b>cgcatcatcagg</b> tcccagg                   | Forward primer to confirm mutagenesis                                     |
| ispA_ins_rev             | <b>ggtgctg</b> tactcgtctctg                   | Reverse primer to confirm mutagenesis                                     |

43 Regions of homology to the target amplicons are in **bold**, regions of reverse complementarity are  
 44 *italicized* and restriction sites are underlined.  
 45

46  
47

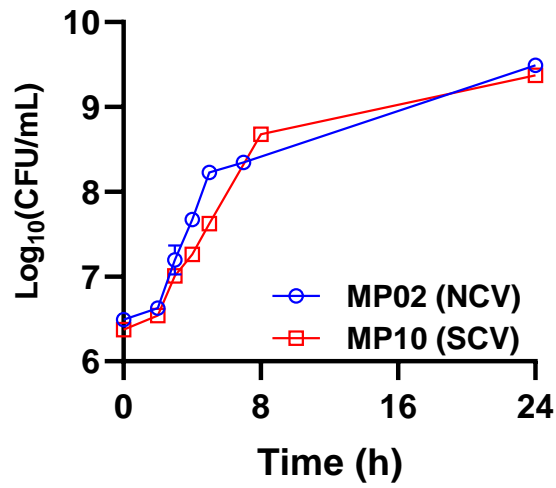

48  
49  
50  
51  
52  
53

**Figure S1. Growth of MP02 and MP10 in LB media at 37°C with constant shaking.** CFU, colony formatting unit; NCV, normal colony variant; SCV, small colony variant.

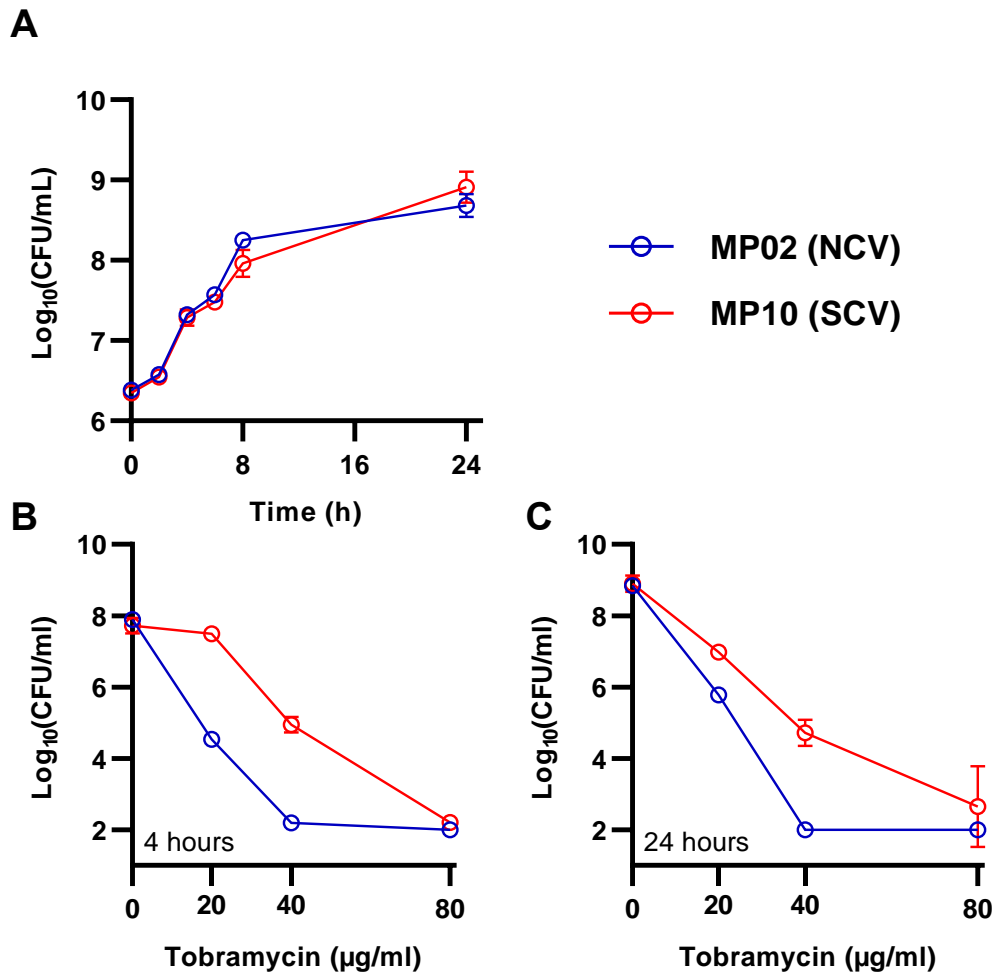

55  
56

57 **Figure S2. Mutations in *ispA* decrease tobramycin-induced killing in M9 minimal medium**  
 58 **supplemented with 20 mM glucose. (A)** Growth curves of MP02 and MP10 incubated in M9 medium  
 59 at 37°C under constant shaking. **(B, C)** Bacteria were grown to mid-exponential phase in M9 at 37°C  
 60 before treatment for 4h **(B)** or 24h **(C)** with increasing concentrations of tobramycin. CFU, colony  
 61 formatting unit; NCV, normal colony variant; SCV, small colony variant.

62  
63  
64  
65

66  
67

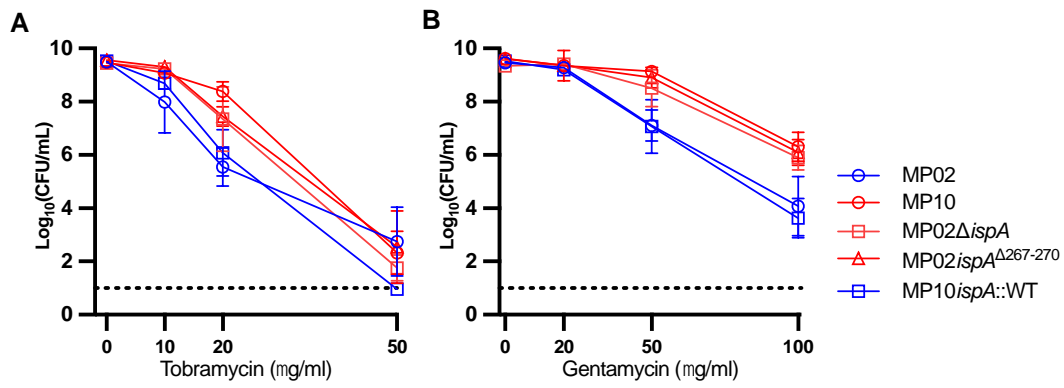

68  
69  
70  
71  
72  
73  
74

**Figure S3. Mutations in *ispA* decrease aminoglycoside-induced killing in LB media.** Bacteria were grown to mid-exponential phase in LB at 37°C and then treated for 24h with either tobramycin (**A**) or gentamicin (**B**). CFU, colony formatting unit; NCV, normal colony variant; SCV, small colony variant.

## REFERENCES

1. Miller VL, Mekalanos JJ. A novel suicide vector and its use in construction of insertion mutations: osmoregulation of outer membrane proteins and virulence determinants in *Vibrio cholerae* requires *toxR*. *Journal of bacteriology* 1988; 170: 2575-2583.
2. Hoang TT, Karkhoff-Schweizer RR, Kutchma AJ, Schweizer HP. A broad-host-range Flp-FRT recombination system for site-specific excision of chromosomally-located DNA sequences: application for isolation of unmarked *Pseudomonas aeruginosa* mutants. *Gene* 1998; 212: 77-86.
